# Supplementary material
Source: PubMed Central journal article supplement (PMC7062362)
Supplement: NIHMS1558213-supplement-Appendix.pdf [file NIHMS1558213-supplement-Appendix.pdf]

Do Social Protection Programs Foster Short-term and Long-term Migration Adaptation Strategies?

Valerie Mueller

Arizona State University, International Food Policy Research Institute

Clark Gray

University of North Carolina, Chapel Hill

Sudhanshu Handa

University of North Carolina, Chapel Hill

David Seidenfeld

American Institutes of Research

## APPENDIX

**Table A.1: Household Baseline Consumption Per Capita Regression, Current Climate Anomalies**

|               | (1)                  | (2)               |
|---------------|----------------------|-------------------|
| Rain          | -0.734<br>(1.820)    | -0.068<br>(1.557) |
| Temp          | -6.734<br>(1.801)*** | -2.554<br>(1.658) |
| $R^2$         | 0.07                 | 0.12              |
| $N$           | 2,284                | 2,284             |
| District FEs? | No                   | Yes               |

Notes: Unit of analysis is household. Village-clustered standard errors reported.

\*  $p < 0.1$  \*\*  $p < 0.05$ ; \*\*\*  $p < 0.01$ .

**Table A.2: Intent-to-treat and Heterogeneous Effects of Cash Transfer on Migration, Current Climate Anomalies, Village-fixed effects**

|                                                            | Any move             |                   | Moves near           |                      | Moves far         |                      |
|------------------------------------------------------------|----------------------|-------------------|----------------------|----------------------|-------------------|----------------------|
|                                                            | (1)                  | (2)               | (3)                  | (4)                  | (5)               | (6)                  |
|                                                            | Men                  | Women             | Men                  | Women                | Men               | Women                |
| T                                                          | -0.074<br>(0.022)*** | -0.005<br>(0.012) | -0.068<br>(0.016)*** | -0.032<br>(0.003)*** | -0.015<br>(0.011) | -0.013<br>(0.003)*** |
| T x Rain                                                   | 0.013<br>(0.019)     | -0.000<br>(0.013) | 0.020<br>(0.014)     | 0.009<br>(0.009)     | -0.004<br>(0.017) | -0.009<br>(0.010)    |
| T x Temp                                                   | -0.009<br>(0.018)    | 0.000<br>(0.011)  | -0.023†<br>(0.015)   | 0.001<br>(0.010)     | 0.011<br>(0.013)  | 0.002<br>(0.008)     |
| Rain                                                       | 0.056<br>(0.025)**   | 0.005<br>(0.011)  | 0.043<br>(0.015)***  | -0.004<br>(0.009)    | 0.018<br>(0.022)  | 0.010<br>(0.010)     |
| Temp                                                       | -0.045<br>(0.023)*   | 0.003<br>(0.011)  | -0.032<br>(0.016)**  | -0.000<br>(0.009)    | -0.019<br>(0.017) | 0.001<br>(0.010)     |
| $R_2$                                                      | 0.10                 | 0.11              | 0.08                 | 0.07                 | 0.07              | 0.06                 |
| $N$                                                        | 6,198                | 8,208             | 5,992                | 8,024                | 5,941             | 7,972                |
| <i>F test, p-values</i>                                    |                      |                   |                      |                      |                   |                      |
| $H_a = \text{Rain} + \text{T} \times \text{Rain}; H_a = 0$ | 0.003                | 0.649             | 0.000                | 0.558                | 0.417             | 0.946                |
| $H_b = \text{Temp} + \text{T} \times \text{Temp}; H_b = 0$ | 0.019                | 0.757             | 0.001                | 0.953                | 0.610             | 0.610                |
| $H_a (1/3/5) = H_a (2/4/6)$                                |                      | 0.014             |                      | 0.004                |                   | 0.473                |
| $H_b (1/3/5) = H_b (2/4/6)$                                |                      | 0.023             |                      | 0.004                |                   | 0.519                |

Notes: Unit of analysis is person-year. T abbreviates treatment. Village-clustered standard errors reported. All specifications include individual and household explanatory variables, as well as village and survey fixed effects. The notation  $H_a (1/3/5)$  indicates equation  $H_a$  using the estimates from models 1, 3, or 5, respectively, depending on the table column. Thus,  $H_a (1/3/5) = H_a (2/4/6)$  is testing whether the expression  $H_a$  is equal for men and women using the estimates from models (1/3/5) and (2/4/6), respectively, depending on the table column. \*  $p < 0.1$  \*\*  $p < 0.05$ ; \*\*\*  $p < 0.01$ .

**Table A.3: Intent-to-treat and Heterogeneous Effects of Cash Transfer on Migration, Current Climate Anomalies, Rainfall-Pixel Clustered Standard Errors**

|                                                            | Any move             |                   | Moves near           |                    | Moves far           |                    |
|------------------------------------------------------------|----------------------|-------------------|----------------------|--------------------|---------------------|--------------------|
|                                                            | (1)                  | (2)               | (3)                  | (4)                | (5)                 | (6)                |
|                                                            | Men                  | Women             | Men                  | Women              | Men                 | Women              |
| T                                                          | -0.016<br>(0.012)    | 0.006<br>(0.009)  | -0.017<br>(0.008)**  | 0.005<br>(0.005)   | -0.002<br>(0.009)   | 0.003<br>(0.008)   |
| T x Rain                                                   | 0.008<br>(0.019)     | 0.013<br>(0.016)  | 0.023<br>(0.014)     | 0.020<br>(0.010)** | -0.012<br>(0.017)   | -0.005<br>(0.012)  |
| T x Temp                                                   | -0.016<br>(0.017)    | 0.001<br>(0.013)  | -0.034<br>(0.013)*** | -0.004<br>(0.009)  | 0.014<br>(0.012)    | 0.007<br>(0.010)   |
| Rain                                                       | 0.078<br>(0.022)***  | 0.007<br>(0.012)  | 0.048<br>(0.014)***  | -0.009<br>(0.008)  | 0.034<br>(0.018)*   | 0.017<br>(0.009)** |
| Temp                                                       | -0.059<br>(0.018)*** | -0.004<br>(0.010) | -0.033<br>(0.013)**  | 0.002<br>(0.008)   | -0.032<br>(0.014)** | -0.009<br>(0.007)  |
| $R_2$                                                      | 0.07                 | 0.09              | 0.04                 | 0.06               | 0.04                | 0.05               |
| $N$                                                        | 6,198                | 8,208             | 5,992                | 8,024              | 5,941               | 7,972              |
| <i>F test, p-values</i>                                    |                      |                   |                      |                    |                     |                    |
| $H_a = \text{Rain} + \text{T} \times \text{Rain}; H_a = 0$ | 0.000                | 0.139             | 0.000                | 0.231              | 0.133               | 0.181              |
| $H_b = \text{Temp} + \text{T} \times \text{Temp}; H_b = 0$ | 0.000                | 0.867             | 0.000                | 0.769              | 0.255               | 0.255              |
| $H_a (1/3/5) = H_a (2/4/6)$                                |                      | 0.009             |                      | 0.000              |                     | 0.593              |
| $H_b (1/3/5) = H_b (2/4/6)$                                |                      | 0.007             |                      | 0.000              |                     | 0.460              |

Notes: Unit of analysis is person-year. T abbreviates treatment. Rainfall-pixel clustered standard errors reported. All specifications include individual and household explanatory variables, as well as district and survey fixed effects. The notation  $H_a (1/3/5)$  indicates equation  $H_a$  using the estimates from models 1, 3, or 5, respectively, depending on the table column. Thus,  $H_a (1/3/5) = H_a (2/4/6)$  is testing whether the expression  $H_a$  is equal for men and women using the estimates from models (1/3/5) and (2/4/6), respectively, depending on the table column. \*  $p < 0.1$  \*\*  $p < 0.05$ ; \*\*\*  $p < 0.01$ .

**Table A.4: Intent-to-treat and Heterogeneous Effects of Cash Transfer on Migration, Current Climate Anomalies, Temperature-Pixel Clustered Standard Errors**

|                                                            | Any move             |                   | Moves near           |                   | Moves far           |                   |
|------------------------------------------------------------|----------------------|-------------------|----------------------|-------------------|---------------------|-------------------|
|                                                            | (1)                  | (2)               | (3)                  | (4)               | (5)                 | (6)               |
|                                                            | Men                  | Women             | Men                  | Women             | Men                 | Women             |
| T                                                          | -0.016<br>(0.011)    | 0.006<br>(0.010)  | -0.017<br>(0.007)**  | 0.005<br>(0.006)  | -0.002<br>(0.011)   | 0.003<br>(0.008)  |
| T x Rain                                                   | 0.008<br>(0.022)     | 0.013<br>(0.021)  | 0.023<br>(0.012)*    | 0.020<br>(0.011)* | -0.012<br>(0.017)   | -0.005<br>(0.014) |
| T x Temp                                                   | -0.016<br>(0.023)    | 0.001<br>(0.015)  | -0.034<br>(0.018)*   | -0.004<br>(0.012) | 0.014<br>(0.014)    | 0.007<br>(0.009)  |
| Rain                                                       | 0.078<br>(0.021)***  | 0.007<br>(0.014)  | 0.048<br>(0.013)***  | -0.009<br>(0.008) | 0.034<br>(0.018)*   | 0.017<br>(0.010)  |
| Temp                                                       | -0.059<br>(0.016)*** | -0.004<br>(0.012) | -0.033<br>(0.010)*** | 0.002<br>(0.008)  | -0.032<br>(0.013)** | -0.009<br>(0.009) |
| $R_2$                                                      | 0.07                 | 0.09              | 0.04                 | 0.06              | 0.04                | 0.05              |
| $N$                                                        | 6,198                | 8,208             | 5,992                | 8,024             | 5,941               | 7,972             |
| <i>F test, p-values</i>                                    |                      |                   |                      |                   |                     |                   |
| $H_a = \text{Rain} + \text{T} \times \text{Rain}; H_a = 0$ | 0.001                | 0.249             | 0.002                | 0.286             | 0.076               | 0.303             |
| $H_b = \text{Temp} + \text{T} \times \text{Temp}; H_b = 0$ | 0.007                | 0.863             | 0.002                | 0.797             | 0.243               | 0.243             |
| $H_a (1/3/5) = H_a (2/4/6)$                                |                      | 0.045             |                      | 0.019             |                     | 0.630             |
| $H_b (1/3/5) = H_b (2/4/6)$                                |                      | 0.051             |                      | 0.016             |                     | 0.467             |

Notes: Unit of analysis is person-year. T abbreviates treatment. Temperature-pixel clustered standard errors reported. All specifications include individual and household explanatory variables, as well as district and survey fixed effects. The notation  $H_a (1/3/5)$  indicates equation  $H_a$  using the estimates from models 1, 3, or 5, respectively, depending on the table column. Thus,  $H_a (1/3/5) = H_a (2/4/6)$  is testing whether the expression  $H_a$  is equal for men and women using the estimates from models (1/3/5) and (2/4/6), respectively, depending on the table column. \*  $p < 0.1$  \*\*  $p < 0.05$ ; \*\*\*  $p < 0.01$ .

**Table A.5: Intent-to-treat and Heterogeneous Effects of Cash Transfer on Migration, Lagged Climate Anomalies**

|                                                                | Any move            |                     | Moves near         |                   | Moves far          |                      |
|----------------------------------------------------------------|---------------------|---------------------|--------------------|-------------------|--------------------|----------------------|
|                                                                | (1)<br>Men          | (2)<br>Women        | (3)<br>Men         | (4)<br>Women      | (5)<br>Men         | (6)<br>Women         |
| <i>Panel A: Lagged Climate Anomalies</i>                       |                     |                     |                    |                   |                    |                      |
| T                                                              | -0.009<br>(0.013)   | 0.009<br>(0.009)    | -0.006<br>(0.010)  | 0.004<br>(0.006)  | -0.003<br>(0.008)  | 0.007<br>(0.007)     |
| T x Rain                                                       | -0.005<br>(0.012)   | 0.002<br>(0.007)    | -0.009<br>(0.008)  | 0.001<br>(0.005)  | 0.003<br>(0.010)   | 0.003<br>(0.006)     |
| T x Temp                                                       | -0.013<br>(0.031)   | 0.018<br>(0.020)    | -0.029<br>(0.023)  | -0.001<br>(0.013) | 0.017<br>(0.022)   | 0.024<br>(0.017)     |
| Rain                                                           | 0.003<br>(0.010)    | 0.001<br>(0.006)    | -0.000<br>(0.006)  | -0.002<br>(0.004) | 0.001<br>(0.008)   | 0.003<br>(0.005)     |
| Temp                                                           | -0.080<br>(0.035)** | -0.024<br>(0.016)   | -0.051<br>(0.027)* | -0.008<br>(0.012) | -0.040<br>(0.023)* | -0.021<br>(0.013)    |
| $R_2$                                                          | 0.07                | 0.09                | 0.04               | 0.06              | 0.04               | 0.05                 |
| <i>F test, p-values</i>                                        |                     |                     |                    |                   |                    |                      |
| $H_a = \text{Rain} + \text{T x Rain}; H_a = 0$                 | 0.697               | 0.491               | 0.099              | 0.677             | 0.426              | 0.170                |
| $H_b = \text{Temp} + \text{T x Temp}; H_b = 0$                 | 0.006               | 0.773               | 0.003              | 0.467             | 0.232              | 0.232                |
| $H_a (1/3/5) = H_a (2/4/6)$                                    |                     | 0.463               |                    | 0.260             |                    | 0.823                |
| $H_b (1/3/5) = H_b (2/4/6)$                                    |                     | 0.032               |                    | 0.018             |                    | 0.301                |
| <i>Panel B: Positive vs. Negative Lagged Climate Anomalies</i> |                     |                     |                    |                   |                    |                      |
| T                                                              | 0.005<br>(0.015)    | 0.002<br>(0.011)    | 0.004<br>(0.013)   | 0.004<br>(0.007)  | 0.002<br>(0.010)   | -0.001<br>(0.007)    |
| T x Rain-                                                      | -0.065<br>(0.049)   | 0.042<br>(0.031)    | -0.031<br>(0.035)  | 0.011<br>(0.021)  | -0.040<br>(0.034)  | 0.035<br>(0.026)     |
| T x Rain+                                                      | -0.019<br>(0.017)   | 0.009<br>(0.009)    | -0.015<br>(0.011)  | 0.003<br>(0.006)  | -0.005<br>(0.015)  | 0.008<br>(0.008)     |
| T x Temp-                                                      | 0.018<br>(0.040)    | -0.021<br>(0.024)   | 0.025<br>(0.029)   | -0.004<br>(0.015) | -0.008<br>(0.029)  | -0.022<br>(0.020)    |
| T x Temp+                                                      | -0.147<br>(0.254)   | 0.086<br>(0.203)    | -0.215<br>(0.189)  | -0.087<br>(0.126) | 0.044<br>(0.151)   | 0.154<br>(0.148)     |
| Rain-                                                          | 0.028<br>(0.039)    | -0.023<br>(0.023)   | 0.002<br>(0.028)   | 0.008<br>(0.018)  | 0.031<br>(0.032)   | -0.028<br>(0.016)*   |
| Rain+                                                          | 0.009<br>(0.016)    | 0.000<br>(0.008)    | -0.001<br>(0.010)  | -0.000<br>(0.005) | 0.009<br>(0.014)   | 0.001<br>(0.007)     |
| Temp-                                                          | 0.073<br>(0.040)*   | 0.010<br>(0.019)    | 0.050<br>(0.031)   | 0.001<br>(0.013)  | 0.034<br>(0.028)   | 0.012<br>(0.016)     |
| Temp+                                                          | -0.080<br>(0.210)   | -0.281<br>(0.129)** | -0.011<br>(0.158)  | -0.081<br>(0.087) | -0.043<br>(0.119)  | -0.227<br>(0.080)*** |
| $R_2$                                                          | 0.07                | 0.09                | 0.04               | 0.06              | 0.04               | 0.05                 |
| <i>F test, p-values</i>                                        |                     |                     |                    |                   |                    |                      |
| $H_a = \text{T} + \text{T x Rain-}; H_a = 0$                   | 0.337               | 0.422               | 0.371              | 0.250             | 0.711              | 0.774                |
| $H_b = \text{T} + \text{T x Rain+}; H_b = 0$                   | 0.331               | 0.210               | 0.057              | 0.519             | 0.686              | 0.152                |
| $H_c = \text{T} + \text{T x Temp-}; H_c = 0$                   | 0.016               | 0.580               | 0.012              | 0.829             | 0.208              | 0.208                |
| $H_d = \text{T} + \text{T x Temp+}; H_d = 0$                   | 0.092               | 0.213               | 0.027              | 0.073             | 0.995              | 0.995                |
| $H_a (1/3/5) = H_a (2/4/6)$                                    |                     | 0.273               |                    | 0.179             |                    | 0.681                |
| $H_b (1/3/5) = H_b (2/4/6)$                                    |                     | 0.150               |                    | 0.059             |                    | 0.612                |
| $H_c (1/3/5) = H_c (2/4/6)$                                    |                     | 0.029               |                    | 0.019             |                    | 0.198                |
| $H_d (1/3/5) = H_d (2/4/6)$                                    |                     | 0.821               |                    | 0.576             |                    | 0.479                |
| $N$                                                            | 6,198               | 8,208               | 5,992              | 8,024             | 5,941              | 7,972                |

Notes: Unit of analysis is person-year. T abbreviates treatment. Rain+ and Temp+ use the absolute values of z scores that are greater than or equal to zero. Rain- and Temp- use the absolute values of z scores that are less than zero. Village-clustered standard errors reported. All specifications include individual and household explanatory variables, as well as district and survey

fixed effects. The notation  $H_a (1/3/5)$  indicates equation  $H_a$  using the estimates from models 1, 3, or 5, respectively, depending on the table column. Thus,  $H_a (1/3/5) = H_a (2/4/6)$  is testing whether the expression  $H_a$  is equal for men and women using the estimates from models (1/3/5) and (2/4/6), respectively, depending on the table column. \*  $p < 0.1$  \*\*  $p < 0.05$ ; \*\*\*  $p < 0.01$ .

**Table A.6: Intent-to-treat and Heterogeneous Effects of Cash Transfer on Migration, Contemporaneous and Lagged Climate Levels**

|                                                    | Any move            |                     | Moves near        |                   | Moves far           |                    |
|----------------------------------------------------|---------------------|---------------------|-------------------|-------------------|---------------------|--------------------|
|                                                    | (1)<br>Men          | (2)<br>Women        | (3)<br>Men        | (4)<br>Women      | (5)<br>Men          | (6)<br>Women       |
| <i>Panel A: Contemporaneous Climate Levels</i>     |                     |                     |                   |                   |                     |                    |
| T                                                  | 0.040<br>(0.409)    | -0.027<br>(0.274)   | 0.112<br>(0.335)  | 0.039<br>(0.196)  | -0.057<br>(0.244)   | -0.142<br>(0.170)  |
| T x Rain                                           | -0.000<br>(0.001)   | 0.000<br>(0.000)    | 0.001<br>(0.001)  | 0.000<br>(0.000)  | -0.001<br>(0.000)   | 0.000<br>(0.000)   |
| T x Temp                                           | -0.002<br>(0.018)   | 0.001<br>(0.012)    | -0.007<br>(0.015) | -0.002<br>(0.008) | 0.004<br>(0.010)    | 0.006<br>(0.007)   |
| Rain                                               | 0.002<br>(0.001)*** | 0.000<br>(0.000)    | 0.001<br>(0.000)  | -0.000<br>(0.000) | 0.001<br>(0.000)*** | 0.000<br>(0.000)   |
| Temp                                               | -0.000<br>(0.011)   | 0.015<br>(0.005)*** | 0.006<br>(0.007)  | 0.006<br>(0.003)* | -0.006<br>(0.007)   | 0.009<br>(0.004)** |
| R <sub>2</sub>                                     | 0.07                | 0.09                | 0.04              | 0.06              | 0.05                | 0.05               |
| <i>F test, p-values</i>                            |                     |                     |                   |                   |                     |                    |
| H <sub>a</sub> =Rain + T x Rain; H <sub>a</sub> =0 | 0.036               | 0.842               | 0.119             | 0.871             | 0.040               | 0.702              |
| H <sub>b</sub> =Temp + T x Temp; H <sub>b</sub> =0 | 0.888               | 0.142               | 0.969             | 0.540             | 0.795               | 0.795              |
| H <sub>a</sub> (1/3/5)= H <sub>a</sub> (2/4/6)     |                     | 0.104               |                   | 0.162             |                     | 0.177              |
| H <sub>b</sub> (1/3/5)= H <sub>b</sub> (2/4/6)     |                     | 0.242               |                   | 0.672             |                     | 0.124              |
| <i>Panel B: Lagged Climate Levels</i>              |                     |                     |                   |                   |                     |                    |
| T                                                  | -0.378<br>(0.433)   | -0.011<br>(0.293)   | -0.366<br>(0.338) | 0.097<br>(0.201)  | -0.068<br>(0.257)   | -0.175<br>(0.194)  |
| T x Rain                                           | -0.000<br>(0.000)   | -0.000<br>(0.000)   | 0.000<br>(0.000)  | -0.000<br>(0.000) | -0.000<br>(0.000)   | -0.000<br>(0.000)  |
| T x Temp                                           | 0.017<br>(0.018)    | 0.001<br>(0.012)    | 0.015<br>(0.014)  | -0.003<br>(0.008) | 0.004<br>(0.011)    | 0.008<br>(0.008)   |
| Rain                                               | 0.001<br>(0.000)    | 0.000<br>(0.000)    | -0.000<br>(0.000) | 0.000<br>(0.000)  | 0.001<br>(0.000)**  | 0.000<br>(0.000)   |
| Temp                                               | -0.005<br>(0.014)   | 0.013<br>(0.005)**  | -0.000<br>(0.008) | 0.006<br>(0.003)* | -0.005<br>(0.009)   | 0.007<br>(0.005)   |
| R <sub>2</sub>                                     | 0.07                | 0.09                | 0.04              | 0.06              | 0.04                | 0.05               |
| <i>F test, p-values</i>                            |                     |                     |                   |                   |                     |                    |
| H <sub>a</sub> =Rain + T x Rain; H <sub>a</sub> =0 | 0.269               | 0.995               | 0.934             | 0.464             | 0.105               | 0.397              |
| H <sub>b</sub> =Temp + T x Temp; H <sub>b</sub> =0 | 0.331               | 0.207               | 0.172             | 0.707             | 0.812               | 0.812              |
| H <sub>a</sub> (1/3/5)= H <sub>a</sub> (2/4/6)     |                     | 0.185               |                   | 0.617             |                     | 0.096              |
| H <sub>b</sub> (1/3/5)= H <sub>b</sub> (2/4/6)     |                     | 0.727               |                   | 0.155             |                     | 0.100              |
| N                                                  | 6,198               | 8,208               | 5,992             | 8,024             | 5,941               | 7,972              |

Notes: Unit of analysis is person-year. T abbreviates treatment. All specifications include individual and household explanatory variables, as well as district and survey fixed effects. The notation H<sub>a</sub> (1/3/5) indicates equation H<sub>a</sub> using the estimates from models 1, 3, or 5, respectively, depending on the table column. Thus, H<sub>a</sub> (1/3/5)= H<sub>a</sub> (2/4/6) is testing whether the expression H<sub>a</sub> is equal for men and women using the estimates from models (1/3/5) and (2/4/6), respectively, depending on the table column.

\*  $p < 0.1$  \*\*  $p < 0.05$ ; \*\*\*  $p < 0.01$ .

**Table A.7: Pearson Correlation Coefficients**

| Variable         | R <sub>t</sub> | T <sub>t</sub> | R <sub>t-1</sub> | T <sub>t-1</sub> |
|------------------|----------------|----------------|------------------|------------------|
| R <sub>t</sub>   | 1.00           |                |                  |                  |
| T <sub>t</sub>   | 0.44           | 1.00           |                  |                  |
| R <sub>t-1</sub> | 0.16           | 0.34           | 1.00             |                  |
| T <sub>t-1</sub> | 0.18           | -0.08          | -0.59            | 1.00             |

Notes: R and T refer to rainfall and temperature z scores, respectively. The subscripts t and t-1 denote 0- and 1-year lagged variables.

**Table A.8: Intent-to-treat and Climate Heterogeneous Effects of Cash Transfer on Male Migration, by Temporal Differences in Climate Exposure**

|                                                                  | (1)<br>Moves near<br>One-Year Lag |
|------------------------------------------------------------------|-----------------------------------|
| T                                                                | -0.028<br>(0.013)**               |
| T x Rain                                                         | 0.029<br>(0.018)                  |
| T x Temp                                                         | -0.036<br>(0.016)**               |
| T x Lagged Rain                                                  | -0.002<br>(0.010)                 |
| T x Lagged Temp                                                  | -0.036<br>(0.026)                 |
| Rain                                                             | 0.056<br>(0.016)***               |
| Temp                                                             | -0.016<br>(0.016)                 |
| Lagged Rain                                                      | -0.019<br>(0.010)*                |
| Lagged Temp                                                      | -0.041<br>(0.025)                 |
| <i>R</i> <sub>2</sub>                                            | 0.05                              |
| <i>F</i> statistic, <i>p</i> -values                             |                                   |
| H <sub>a</sub> =Rain + T x Rain; H <sub>a</sub> =0               | 0.000                             |
| H <sub>b</sub> =Temp + T x Temp; H <sub>b</sub> =0               | 0.001                             |
| H <sub>c</sub> =Lagged Rain + T x Lagged Rain; H <sub>c</sub> =0 | 0.020                             |
| H <sub>d</sub> =Lagged Temp + T x Lagged Temp; H <sub>d</sub> =0 | 0.001                             |
| <i>N</i>                                                         | 5,992                             |

Notes: Unit of analysis is person-year. T abbreviates treatment. Village-clustered standard errors reported. All specifications include individual and household explanatory variables, as well as district and survey fixed effects.

\*  $p < 0.1$  \*\*  $p < 0.05$  \*\*\*  $p < 0.01$

**Table A.9: Intent-to-treat and Heterogeneous Effects of Cash Transfer on Migration, Current Wet Season Climate Anomalies**

|                                                    | Any move            |                   | Moves near           |                   | Moves far         |                   |
|----------------------------------------------------|---------------------|-------------------|----------------------|-------------------|-------------------|-------------------|
|                                                    | (1)                 | (2)               | (3)                  | (4)               | (5)               | (6)               |
|                                                    | Men                 | Women             | Men                  | Women             | Men               | Women             |
| T                                                  | -0.021<br>(0.016)   | 0.003<br>(0.009)  | -0.028<br>(0.010)*** | -0.003<br>(0.008) | 0.003<br>(0.013)  | 0.007<br>(0.007)  |
| T x Rain                                           | 0.002<br>(0.011)    | 0.005<br>(0.008)  | 0.009<br>(0.008)     | 0.008<br>(0.005)  | -0.005<br>(0.010) | -0.002<br>(0.006) |
| T x Temp                                           | -0.027<br>(0.026)   | 0.002<br>(0.015)  | -0.050<br>(0.020)**  | -0.007<br>(0.012) | 0.017<br>(0.020)  | 0.012<br>(0.011)  |
| Rain                                               | 0.045<br>(0.013)*** | 0.007<br>(0.008)  | 0.028<br>(0.010)***  | -0.001<br>(0.005) | 0.019<br>(0.011)  | 0.009<br>(0.006)  |
| Temp                                               | -0.067<br>(0.028)** | -0.010<br>(0.013) | -0.035<br>(0.020)*   | -0.002<br>(0.010) | -0.036<br>(0.022) | -0.013<br>(0.009) |
| <i>R</i> <sup>2</sup>                              | 0.07                | 0.09              | 0.04                 | 0.06              | 0.04              | 0.05              |
| <i>N</i>                                           | 6,198               | 8,208             | 5,992                | 8,024             | 5,941             | 7,972             |
| <i>F</i> statistic, <i>p</i> -values               |                     |                   |                      |                   |                   |                   |
| H <sub>a</sub> =Rain + T x Rain; H <sub>a</sub> =0 | 0.000               | 0.139             | 0.000                | 0.191             | 0.077             | 0.196             |
| H <sub>b</sub> =Temp + T x Temp; H <sub>b</sub> =0 | 0.000               | 0.637             | 0.000                | 0.420             | 0.176             | 0.176             |
| H <sub>a</sub> (1/3/5)= H <sub>a</sub> (2/4/6)     |                     | 0.021             |                      | 0.005             |                   | 0.541             |
| H <sub>b</sub> (1/3/5)= H <sub>b</sub> (2/4/6)     |                     | 0.006             |                      | 0.001             |                   | 0.369             |

Notes: Unit of analysis is person-year. Village-clustered standard errors reported. \*  $p < 0.1$  \*\*  $p < 0.05$ ; \*\*\*  $p < 0.01$ . District and survey fixed effects included. The wet season is defined as December through March.

**Table A.10: Average Individual and Household Baseline Characteristics for Males by Treatment and Wealth Status**

|                                          | Poor              |                   |                  | Less Poor         |                   |                  |
|------------------------------------------|-------------------|-------------------|------------------|-------------------|-------------------|------------------|
|                                          | Control           | Treated           | Difference       | Control           | Treated           | Difference       |
| Age is 19 to 35 years old                | 0.451<br>(0.022)  | 0.496<br>(0.023)  | 0.05<br>[ 0.16]  | 0.590<br>(0.022)  | 0.567<br>(0.021)  | -0.02<br>[ 0.51] |
| Age is 36 to 55 years old                | 0.333<br>(0.021)  | 0.291<br>(0.020)  | -0.04<br>[ 0.11] | 0.262<br>(0.020)  | 0.292<br>(0.019)  | 0.03<br>[ 0.26]  |
| Age is greater than 55 years old         | 0.023<br>(0.007)  | 0.026<br>(0.007)  | 0.00<br>[ 0.71]  | 0.026<br>(0.007)  | 0.013<br>(0.005)  | -0.01<br>[ 0.13] |
| Number of people ages 6 - 12             | 1.725<br>(0.052)  | 1.652<br>(0.052)  | -0.07<br>[ 0.53] | 1.221<br>(0.051)  | 1.325<br>(0.052)  | 0.10<br>[ 0.43]  |
| Number of people ages 13 - 18            | 0.946<br>(0.048)  | 0.961<br>(0.046)  | 0.02<br>[ 0.88]  | 0.626<br>(0.041)  | 0.792<br>(0.041)  | 0.17<br>[ 0.08]  |
| Number of people ages 19 - 35            | 1.315<br>(0.038)  | 1.539<br>(0.039)  | 0.22<br>[ 0.01]  | 1.600<br>(0.046)  | 1.558<br>(0.041)  | -0.04<br>[ 0.71] |
| Number of people ages 36 - 55            | 0.845<br>(0.036)  | 0.754<br>(0.035)  | -0.09<br>[ 0.20] | 0.646<br>(0.036)  | 0.690<br>(0.035)  | 0.04<br>[ 0.51]  |
| Number of people ages 56 - 69            | 0.060<br>(0.012)  | 0.083<br>(0.014)  | 0.02<br>[ 0.47]  | 0.097<br>(0.014)  | 0.054<br>(0.011)  | -0.04<br>[ 0.14] |
| Mean of 12-month rainfall, 1981-2009     | 74.688<br>(0.478) | 76.189<br>(0.594) | 1.50<br>[ 0.59]  | 75.916<br>(0.525) | 77.646<br>(0.531) | 1.73<br>[ 0.52]  |
| SD of 12-month rainfall, 1981-2009       | 15.187<br>(0.161) | 15.632<br>(0.177) | 0.44<br>[ 0.58]  | 16.910<br>(0.172) | 16.828<br>(0.186) | -0.08<br>[ 0.93] |
| Mean of 12 month-temperatures, 1981-2009 | 23.517<br>(0.023) | 23.579<br>(0.018) | 0.06<br>[ 0.54]  | 23.518<br>(0.024) | 23.591<br>(0.017) | 0.07<br>[ 0.48]  |
| SD of 12 month-temperatures, 1981-2009   | 0.501<br>(0.005)  | 0.507<br>(0.005)  | 0.01<br>[ 0.81]  | 0.535<br>(0.004)  | 0.522<br>(0.004)  | -0.01<br>[ 0.53] |
| Kaputa                                   | 0.445<br>(0.022)  | 0.421<br>(0.022)  | -0.02<br>[ 0.84] | 0.264<br>(0.020)  | 0.327<br>(0.020)  | 0.06<br>[ 0.54]  |
| Shangombo                                | 0.412<br>(0.022)  | 0.429<br>(0.022)  | 0.02<br>[ 0.89]  | 0.364<br>(0.021)  | 0.321<br>(0.020)  | -0.04<br>[ 0.70] |
| <i>N</i>                                 | 517               | 492               |                  | 503               | 554               |                  |

Notes: P values in brackets for t tests of difference in means. F statistic testing joint significance of all variables for poor sample is 1.35 (p-value=0.20). F statistic testing joint significance of all variables for less poor sample is 1.12 (p-value=0.35).
